# Supplementary material for: Water-soluble extracts from edible mushrooms (Agaricus bisporus) as inhibitors of hepatitis C viral replication
Source: Royal Society of Chemistry journal article supplement (doi:10.1039/c9fo00733d), 2019-01-01
Supplement: c9fo00733d1.pdf [file c9fo00733d1.pdf]

## SUPPLEMENTARY MATERIAL

### **Water-soluble extracts from edible mushrooms (*Agaricus bisporus*) as inhibitors of the hepatitis C viral replication**

Paloma Gallego<sup>a</sup>, Ángela Rojas<sup>b</sup>, Gonzalo Falcón<sup>c</sup>, Pilar Carbonero<sup>c</sup>, María R García-Lozano<sup>a</sup>, Antonio Gil<sup>b</sup>, Lourdes Grande<sup>a</sup>, Manuel Romero-Gómez<sup>b</sup>, Juan D Bautista<sup>c\*\*</sup>, José A del Campo<sup>a\*</sup>

**Table 1S.** Reagents, antibodies and primers used in this study

| Product | Cat.no | Company |
|---------|--------|---------|
|---------|--------|---------|

|                                                 |                                                     |                                  |
|-------------------------------------------------|-----------------------------------------------------|----------------------------------|
| β-actin antibody                                | #4967                                               | Cell Signaling                   |
| Core                                            | ALX-804-277                                         | Enzo Life Science                |
| NS3 antibody                                    | Anti-NS3(JFH-1) Monoclonal<br>Clone 2E3             | Biofrontech                      |
| Goat Anti-Mouse IgG<br>(H+L)-HRP                | #172-1011                                           | BioRad                           |
| Goat Anti-Rabbit IgG-HRP                        | #170-6515                                           | BioRad                           |
| Hs_RRN18S_1_SG<br>QuantiTect Primer Assay       | QT00199367                                          | QIAGEN                           |
| JFH-2 fwd/rev                                   | Fwd-CTGTGAGGAACTACTGTCT<br>Rev-CGCCCTATCAGGCAGTACCA | NON-COMMERCIAL                   |
| SensoLyte520 HCV<br>Protease Assay Kit          | #71145                                              | AnaSpec, Inc.                    |
| HCV NS3/4A protease<br>genotype 1b, recombinant | AS-61017-5                                          | AnaSpec, Inc.                    |
| HCV NS3/4A protease<br>genotype 2a, recombinant | AS-72167-5                                          | AnaSpec, Inc.                    |
| HCV NS3/4A protease<br>genotype 3a, recombinant | AS-72168-5                                          | AnaSpec, Inc.                    |
| QuantiTect Rev.<br>Transcription Kit            | 205311                                              | QIAGEN                           |
| M-PER® Mammalian<br>Protein Extraction Reagent, | 78501                                               | Thermo Scientific                |
| WesternBright™ ECL,<br>Quercetin dihydrate      | K-12045<br>HWI00580                                 | Advansta<br>HWI ANALYTIK<br>GmbH |

**Table 2S. Viability and toxicity in Huh7.5 cells using different concentrations of mushroom extract (*AbAEE* extract)**

| <b><i>AbAEE</i><br/>concentration<br/>(mg/ml)</b> | <b>Total cell<br/>count</b> | <b>Viable cell<br/>count</b> | <b>Death cell<br/>Count</b> | <b>Viability</b> | <b>Toxicity</b> |
|---------------------------------------------------|-----------------------------|------------------------------|-----------------------------|------------------|-----------------|
| 10                                                | 13.6 x 10 <sup>6</sup>      | 1.3 x 10 <sup>6</sup>        | 12.3 x 10 <sup>6</sup>      | 9.55 %           | 90.44 %         |
| 5                                                 | 16.3 x 10 <sup>6</sup>      | 3.1 x 10 <sup>6</sup>        | 13.2 x 10 <sup>6</sup>      | 19.01 %          | 80.98 %         |
| 2                                                 | 18.8 x 10 <sup>6</sup>      | 9.1 x 10 <sup>6</sup>        | 9.7 x 10 <sup>6</sup>       | 48.40 %          | 51.59 %         |
| 1                                                 | 23.6 x 10 <sup>6</sup>      | 20.2 x 10 <sup>6</sup>       | 3.4 x 10 <sup>6</sup>       | 85.59 %          | 14.40 %         |
| 0.2                                               | 25.2 x 10 <sup>6</sup>      | 23.8 x 10 <sup>6</sup>       | 1.4 x 10 <sup>6</sup>       | 94.44 %          | 5.55 %          |
| 0.1                                               | 25.9 x 10 <sup>6</sup>      | 25 x 10 <sup>6</sup>         | 0.9 x 10 <sup>6</sup>       | 96.52 %          | 3.47 %          |

**Table 3S. Viability and toxicity in LX2 cells using different concentrations of mushroom extract (*AbAEE* extract)**

| <b>AB concentration (mg/mL)</b> | <b>Total cell count</b> | <b>Viable cell count</b> | <b>Death cell Count</b> | <b>Viability (%)</b> | <b>Cell death (%)</b> |
|---------------------------------|-------------------------|--------------------------|-------------------------|----------------------|-----------------------|
| 10                              | 14.8 x 10 <sup>6</sup>  | 1.8 x 10 <sup>6</sup>    | 13.0 x 10 <sup>6</sup>  | 12.16                | 87.83                 |
| 5                               | 18.2 x 10 <sup>6</sup>  | 3.6 x 10 <sup>6</sup>    | 14.6 x 10 <sup>6</sup>  | 19.78                | 80.21                 |
| 2                               | 23.8 x 10 <sup>6</sup>  | 13.6 x 10 <sup>6</sup>   | 10.2 x 10 <sup>6</sup>  | 57.14                | 42.85                 |
| 1                               | 25.6 x 10 <sup>6</sup>  | 23.2 x 10 <sup>6</sup>   | 2.4 x 10 <sup>6</sup>   | 90.62                | 9.37                  |
| 0.2                             | 27.6 x 10 <sup>6</sup>  | 26.3 x 10 <sup>6</sup>   | 1.3 x 10 <sup>6</sup>   | 95.28                | 4.71                  |

**Table 4S.** List of metabolites identified in the different fractions of *AbAEE*.

| <b>Metabolite</b> | <b>MS spectra (m/z)</b> | <b>Product ions (m/z)</b> | <b>UF-3 kDa</b> | <b>AqF-3 kDa</b> | <b>LLE- OrgF<sub>s</sub></b> | <b>Delgado-Povedano et</b> |
|-------------------|-------------------------|---------------------------|-----------------|------------------|------------------------------|----------------------------|
|-------------------|-------------------------|---------------------------|-----------------|------------------|------------------------------|----------------------------|

| Alkaloid derivative                                    |          |          |   |   |   |   |
|--------------------------------------------------------|----------|----------|---|---|---|---|
| <b>2-Methylpyrrolidine</b>                             | 86.0969  | 43.0539  | + | + | - | + |
|                                                        |          | 41.0390  |   |   |   |   |
| Alkylamines                                            |          |          |   |   |   |   |
| <b>Pantothenic acid</b>                                | 220.1178 | 90.0556  | + | + | - | + |
|                                                        |          | 72.0443  |   |   |   |   |
| <b>Spermidine</b>                                      | 146.1651 | 84.0811  | + | + | - | + |
|                                                        |          | 72.0809  |   |   |   |   |
| Pyrroline                                              |          |          |   |   |   |   |
| <b>1-Pyrroline</b>                                     | 70.0652  | 43.0542  | + | + | - | + |
|                                                        |          | 41.0385  |   |   |   |   |
| Amino acids and derivatives                            |          |          |   |   |   |   |
| <b>2,5-Dihydrophenyl-<br/>alanine</b>                  | 168.1019 | 126.0551 | - | - | + | + |
|                                                        |          | 81.0707  |   |   |   |   |
| <b>2-Aminobutyric acid</b>                             | 102.0562 | 102.0562 | + | + | - | + |
| <b>3-Amino-2-<br/>naphthoic acid</b>                   | 188.0703 | 170.0594 | + | + | - | + |
|                                                        |          | 142.0651 |   |   |   |   |
| <b>3-Amino-3-(4-<br/>hydroxyphenyl)<br/>propanoate</b> | 180.0665 | 119.0495 | + | + | - | + |
|                                                        |          | 93.0340  |   |   |   |   |
| <b>5-Aminopentanoate</b>                               | 118.0864 | 74.0588  | + | + | - | + |
|                                                        |          | 58.0625  |   |   |   |   |
| <b>Acetylcarnitine</b>                                 | 204.1231 | 85.0288  | + | + | - | + |
|                                                        |          | 60.0809  |   |   |   |   |
| <b>Citrulline</b>                                      | 176.1031 | 113.0708 | + | + | - | + |
|                                                        |          | 70.0650  |   |   |   |   |
| <b>Cycloleucine</b>                                    | 130.0863 | 84.0809  | + | + | - | + |

|                                     |          |                      |   |   |   |   |
|-------------------------------------|----------|----------------------|---|---|---|---|
|                                     |          | 67.0540              |   |   |   |   |
| <b>Cystathionine</b>                | 223.0746 | 134.0267<br>88.0212  | + | + | - | + |
| <b>Ergothioneine</b>                | 230.0957 | 127.0322<br>60.0809  | + | + | + | + |
| <b>L-2-Aminoadipic acid</b>         | 160.0616 | 116.0720<br>98.0609  | + | + | - | + |
| <b>L-Agaritine</b>                  | 268.1292 | 84.0439<br>77.0389   | + | + | - | + |
| <b>L-Arginine</b>                   | 173.1040 | 131.0823<br>112.0868 | + | + | - | + |
| <b>L-Asparagine</b>                 | 133.0610 | 74.0233<br>46.0283   | + | + | - | + |
| <b>L-Aspartic acid</b>              | 132.0302 | 88.0405<br>71.0139   | + | + | - | + |
| <b>L-Carnitine</b>                  | 162.1124 | 103.0389<br>60.0808  | + | + | - | + |
| <b>L-Glutamate</b>                  | 148.0602 | 85.0284<br>56.0494   | + | + | - | + |
| <b>L-Glutamine</b>                  | 147.0761 | 84.0442<br>56.0493   | + | + | - | + |
| <b>L-Isoleucine</b>                 | 132.1019 | 86.0967<br>69.0699   | + | + | - | + |
| <b>LL-2,6-Diamino heptanedioate</b> | 189.0886 | 84.0444<br>74.0237   | + | + | - | + |

|                                                       |          |                      |   |   |   |   |
|-------------------------------------------------------|----------|----------------------|---|---|---|---|
| <b>L-Leucine</b>                                      | 132.1020 | 86.0967<br>44.0492   | + | + | - | + |
| <b>L-Lysine</b>                                       | 147.1129 | 84.0809<br>56.0492   | - | + | - | + |
| <b>L-Methionine</b>                                   | 150.0585 | 61.0105<br>56.0496   | + | - | - | + |
| <b>L-Phenylalanine</b>                                | 166.0860 | 120.0804<br>103.0544 | + | + | - | + |
| <b>L-Proline</b>                                      | 116.0703 | 70.0652<br>43.0539   | + | + | - | + |
| <b>L-Serine</b>                                       | 104.0353 | 74.0243<br>42.0356   | + | + | - | + |
| <b>L-Threonine</b>                                    | 120.0651 | 74.0599<br>56.0495   | + | + | - | + |
| <b>L-Tryptophan</b>                                   | 205.0972 | 146.0600<br>118.0649 | + | + | - | + |
| <b>L-Tyrosine</b>                                     | 182.0806 | 136.0753<br>91.0542  | + | + | - | + |
| <b>L-Valine</b>                                       | 118.0863 | 72.0809<br>55.0543   | + | + | - | + |
| <b>N2-Acetyl-L-<br/>ornithine</b>                     | 175.1078 | 116.0692<br>70.0653  | + | + | - | + |
| <b>N6-Acetyl-L-2,6-<br/>diamino<br/>heptanedioate</b> | 233.1134 | 87.0433<br>84.0465   | + | + | - | + |

|                                                                 |          |                      |   |   |   |   |
|-----------------------------------------------------------------|----------|----------------------|---|---|---|---|
| <b>N-Carbamylglutamate</b>                                      | 189.0518 | 128.0347<br>102.0560 | + | + | - | + |
| <b>N<math>\epsilon</math>-Acetyl-L-lysine</b>                   | 189.1230 | 126.0909<br>84.0811  | + | + | - | + |
| <b>Ornithine</b>                                                | 133.0973 | 116.0708<br>70.0651  | - | + | - | + |
| <b>Pipecolic acid</b>                                           | 130.0864 | 84.0810<br>56.0493   | + | + | - | + |
| <b>Pyroglutamic acid</b>                                        | 128.0353 | 128.0352<br>82.0294  | + | + | - | + |
| <b>Saccharopine</b>                                             | 277.1393 | 130.0864<br>84.0809  | + | + | - | + |
| <b>Peptides</b>                                                 |          |                      |   |   |   |   |
| <b>Cyclo(L-phe-L-pro)</b>                                       | 245.1286 | 120.0802<br>70.0654  | - | - | + | + |
| <b>Oxidized glutathione</b>                                     | 611.1446 | 306.0762<br>272.0886 | + | + | - | + |
| <b><math>\gamma</math>-D-Glutamylglycine</b>                    | 205.0822 | 142.0494<br>84.0442  | + | + | - | + |
| <b>Quinoline derivative</b>                                     |          |                      |   |   |   |   |
| <b>5,6-Dihydroxy-3-methyl-2-oxo-1,2,5,6-tetrahydroquinoline</b> | 194.0812 | 120.0455<br>57.0332  | - | - | + | + |
| <b>Indoles</b>                                                  |          |                      |   |   |   |   |
| <b>Formyl indole</b>                                            | 146.0596 | 118.0649<br>91.0543  | - | - | + | + |



|                                               |          |                      |   |   |   |   |
|-----------------------------------------------|----------|----------------------|---|---|---|---|
| <b>Indole-3-acetate</b>                       | 174.0559 | 144.0439<br>130.0656 | - | - | + | + |
| <b>Benzaldehyde</b>                           |          |                      |   |   |   |   |
| <b>4-Hydroxy benzaldehyde</b>                 | 123.0444 | 95.0484<br>77.0381   | + | + | - | + |
| <b>Carboxylic acids and derivatives</b>       |          |                      |   |   |   |   |
| <b>2,2-Dimethyl succinic acid</b>             | 145.0505 | 101.0602<br>83.0504  | + | + | - | + |
| <b>3-Hydroxy-3-methyl-glutaric acid</b>       | 161.0454 | 59.0143<br>57.0349   | + | + | - | + |
| <b>Citric acid</b>                            | 191.0195 | 111.0093<br>87.0089  | + | + | - | + |
| <b>Lactic acid</b>                            | 89.0246  | 43.0188<br>41.0032   | + | + | - | + |
| <b>Malic acid</b>                             | 133.0142 | 72.9928<br>71.0135   | + | + | - | + |
| <b>Succinic acid</b>                          | 117.0198 | 73.0297<br>55.0194   | - | + | - | + |
| <b>Cinnamic acid derivative</b>               |          |                      |   |   |   |   |
| <b>p-Coumaric acid</b>                        | 165.0542 | 147.0442<br>119.0493 | + | + | - | + |
| <b>Disaccharides</b>                          |          |                      |   |   |   |   |
| <b>Cellobionic acid</b>                       | 357.1043 | 113.0233<br>89.0233  | + | + | - | + |
| <b><math>\alpha</math>-1,5-L-Arabinobiose</b> | 281.0876 | 89.0244<br>71.0132   | + | + | - | + |
| <b>Monosaccharides</b>                        |          |                      |   |   |   |   |
| <b>Sedoheptulose-7-</b>                       | 289.0332 | 96.9693              | + | + | - | + |

|                                        |          |                     |   |   |   |   |
|----------------------------------------|----------|---------------------|---|---|---|---|
| <b>phosphate</b>                       |          | 78.9592             |   |   |   |   |
| <b>D-Glucosamine 6-phosphate</b>       | 258.0385 | 171.0060<br>78.9615 | - | + | - | + |
| <b>D-Glucose 6-phosphate</b>           | 259.0226 | 96.9693<br>78.9592  | + | + | - | + |
| <b>D-Mannitol</b>                      | 183.0862 | 69.0337<br>57.0330  | + | + | - | + |
| <b>D-Mannitol 1-phosphate</b>          | 261.0379 | 96.9694<br>78.9591  | + | + | - | + |
| <b>Sedoheptulose</b>                   | 209.0664 | 59.0128<br>57.0335  | + | + | - | + |
| <b><math>\alpha</math>-D-Glucose</b>   | 179.0556 | 71.0141<br>59.0134  | + | + | - | + |
| <b>Sugar acids and derivatives</b>     |          |                     |   |   |   |   |
| <b>Galactonic acid</b>                 | 195.0511 | 75.0090<br>59.0139  | + | + | - | + |
| <b>Glucuronic acid</b>                 | 193.0349 | 75.0088<br>59.0139  | + | + | - | + |
| <b>Glyceric acid</b>                   | 105.0189 | 59.0143<br>56.9850  | + | + | - | + |
| <b>2-Dehydro-3-deoxy-L-arabinonate</b> | 147.0300 | 85.0284<br>57.0335  | + | + | - | + |
| <b>Glycerol-2-phosphate</b>            | 171.0066 | 96.9688<br>78.9594  | + | + | - | + |
| <b>Xylonate</b>                        | 165.0402 | 75.0089<br>59.0140  | + | + | - | + |

| <b>Fatty acids and conjugates</b>       |          |                      |   |   |   |   |
|-----------------------------------------|----------|----------------------|---|---|---|---|
| <b>2-Hydroxyisocaproic acid</b>         | 131.0715 | 85.0660<br>69.0340   | + | + | - | + |
| <b>3-Hydroxycapric acid</b>             | 187.1341 | 59.0138<br>41.0031   | - | - | + | + |
| <b>6,7-Epoxy stearic acid</b>           | 297.2438 | 297.2427<br>185.1178 | - | - | + | + |
| <b>9,10-Dihydroxystearic acid</b>       | 315.2541 | 298.2502<br>44.9971  | - | - | + | + |
| <b>9,10-Epoxy-18-hydroxystereate</b>    | 313.2382 | 113.0961<br>99.0804  | - | - | + | + |
| <b>Epsilcapramine</b>                   | 132.1020 | 59.0724<br>132.1018  | + | + | - | + |
| <b>Stearic acid</b>                     | 283.2646 | 283.2638             | - | - | + | + |
| <b><math>\alpha</math>-Licanic acid</b> | 293.2089 | 116.0505<br>45.0336  | - | - | + | + |
| <b>Fatty amides</b>                     |          |                      |   |   |   |   |
| <b>13-Docosenamide</b>                  | 338.3418 | 83.0855<br>57.0697   | - | - | + | + |
| <b>Oleamide</b>                         | 282.2793 | 71.0861<br>57.0693   | - | - | + | + |
| <b>Sphingolipids</b>                    |          |                      |   |   |   |   |
| <b>C16 Sphinganine</b>                  | 274.2739 | 256.2622<br>106.0853 | - | - | + | + |
| <b>Sphinganine</b>                      | 302.3058 | 284.2943<br>57.0692  | - | - | + | + |
| <b>Phospholipid and derivative</b>      |          |                      |   |   |   |   |

|                                           |          |                      |   |   |   |   |
|-------------------------------------------|----------|----------------------|---|---|---|---|
| <b>Phosphocholine</b>                     | 184.0731 | 124.9997<br>86.0967  | + | + | - | + |
| <b>Glycero<br/>phosphocholine</b>         | 258.1099 | 124.9996<br>104.1070 | + | + | - | + |
| <b>No metal oxoanionic compounds</b>      |          |                      |   |   |   |   |
| <b>Phosphate</b>                          | 96.9694  | 96.9690<br>78.9594   | + | + | - | + |
| <b>Phosphite</b>                          | 78.9588  | 78.9599<br>62.9646   | + | + | - | + |
| <b>Phenol derivative</b>                  |          |                      |   |   |   |   |
| <b>p-Aminophenol</b>                      | 110.0601 | 93.0336<br>65.0387   | - | + | + | + |
| <b>Purine nucleoside derivative</b>       |          |                      |   |   |   |   |
| <b>Xanthosine</b>                         | 283.0650 | 151.0260             | + | + | - | + |
| <b>Purine nucleotides and derivatives</b> |          |                      |   |   |   |   |
| <b>3'-AMP</b>                             | 346.0559 | 211.0014<br>78.9590  | + | + | - | + |
| <b>AMP</b>                                | 348.0702 | 136.0619<br>97.0285  | + | + | - | + |
| <b>ADP</b>                                | 426.0220 | 158.9250<br>78.9593  | + | + | - | + |
| <b>cGMP</b>                               | 344.0405 | 150.0421<br>108.0203 | + | + | - | + |
| <b>GDP</b>                                | 442.0173 | 344.0402<br>150.0421 | + | + | - | + |
| <b>GDP-mannose</b>                        | 604.0701 | 442.0177<br>424.0057 | + | + | - | + |

|                                               |          |                      |   |   |   |   |
|-----------------------------------------------|----------|----------------------|---|---|---|---|
| <b>GMP</b>                                    | 364.0654 | 152.0567<br>97.0289  | + | + | - | + |
| <b>N6-(1,2-Dicarboxyethyl)-AMP</b>            | 464.0814 | 252.0724<br>234.0620 | + | + | - | + |
| <b>Purines and purine derivatives</b>         |          |                      |   |   |   |   |
| <b>Adenine</b>                                | 134.0469 | 107.0360<br>92.0248  | + | + | + | + |
| <b>Guanine</b>                                | 152.0568 | 135.0302<br>110.0351 | + | + | + | + |
| <b>Hypoxanthine</b>                           | 137.0454 | 119.0351<br>110.0349 | + | + | + | + |
| <b>Uric acid</b>                              | 167.0210 | 124.0154<br>41.9985  | + | + | - | + |
| <b>Xanthine</b>                               | 151.0260 | 108.0196<br>41.9987  | + | + | + | + |
| <b>Pyrimidine nucleotides and derivatives</b> |          |                      |   |   |   |   |
| <b>UMP</b>                                    | 323.0291 | 96.9691<br>78.9592   | + | + | - | + |
| <b>cUMP</b>                                   | 305.0183 | 111.0197<br>41.9985  | + | + | - | + |
| <b>UDP-D-xylose</b>                           | 535.0374 | 323.0286<br>78.9591  | + | + | - | + |
| <b>UDP-glucose</b>                            | 565.0479 | 384.9842<br>323.0289 | + | + | - | + |
| <b>UDP-glucuronic acid</b>                    | 579.0271 | 402.9954             | + | + | - | + |

|                                |          |                      |   |   |   |   |
|--------------------------------|----------|----------------------|---|---|---|---|
|                                |          | 323.0289             |   |   |   |   |
| <b>UDP-N-acetylglucosamine</b> | 606.0744 | 384.9850<br>282.0392 | + | + | - | + |
| <b>Pyrimidine derivative</b>   |          |                      |   |   |   |   |
| <b>Uracil</b>                  | 111.0199 | 41.9988              | + | - | + | + |
| <b>Pyridine derivative</b>     |          |                      |   |   |   |   |
| <b>Nicotinic acid</b>          | 124.0394 | 80.0497<br>78.0335   | + | + | - | + |

MS: Mass spectrometry

UF-3 kDa: mushroom fraction ( $\leq 3$  kDa) obtained by ultrafiltration

LLE-AqF: Liquid-liquid extraction aqueous fraction

LLE-OrgFs: Liquid-liquid extraction organic fractions

**Table 5S.** Toxicity in rats using a high (750 mg/ml), medium (500 mg/ml) and low (250 mg/ml) *AbAEE* extract dose in water for 15 days.

| <b>Groups</b> | <b>(mg/ml)</b> | <b>Ni</b> | <b>Nf</b> | <b>Deaths</b> |
|---------------|----------------|-----------|-----------|---------------|
|---------------|----------------|-----------|-----------|---------------|

---

|             |     |   |   |   |
|-------------|-----|---|---|---|
| <b>Tox1</b> | 750 | 5 | 5 | 0 |
| <b>Tox2</b> | 500 | 5 | 5 | 0 |
| <b>Tox3</b> | 250 | 5 | 5 | 0 |

---

No death or toxicity has been observed after pathological examination of the liver, lungs, heart and intestines. Ni= initial number of animals in the experiment. Nf= final number of animals in the experiment.
